# Supplementary material for: Proactive Decision Support for Glaucoma Treatment: Predicting Surgical Interventions with Clinically Available Data
Source: MDPI journal article supplement (doi:10.3390/bioengineering11020140), 2024-01-30
Supplement: s1 [file s1]

| <b>Table S1: Summary of all model input features and output in predicting surgical intervention.</b> |                                  |                                                                                                                                                                                                                                                                                                                                                                                                                                                                                                                                             |
|------------------------------------------------------------------------------------------------------|----------------------------------|---------------------------------------------------------------------------------------------------------------------------------------------------------------------------------------------------------------------------------------------------------------------------------------------------------------------------------------------------------------------------------------------------------------------------------------------------------------------------------------------------------------------------------------------|
| <b>Feature Type</b>                                                                                  | <b>Name</b>                      | <b>Description</b>                                                                                                                                                                                                                                                                                                                                                                                                                                                                                                                          |
| Demographics                                                                                         | Age                              | Patient age, years                                                                                                                                                                                                                                                                                                                                                                                                                                                                                                                          |
|                                                                                                      | Sex                              | Patient sex                                                                                                                                                                                                                                                                                                                                                                                                                                                                                                                                 |
|                                                                                                      | Self-reported Race               | Patient race based on self-report                                                                                                                                                                                                                                                                                                                                                                                                                                                                                                           |
|                                                                                                      | Self-reported Ethnicity          | Patient ethnicity based on self-report                                                                                                                                                                                                                                                                                                                                                                                                                                                                                                      |
| VF                                                                                                   | Mean Deviation (MD)              | 24-2 mean deviation, dB                                                                                                                                                                                                                                                                                                                                                                                                                                                                                                                     |
|                                                                                                      | Pattern Standard Deviation (PSD) | 24-2 pattern standard deviation, dB                                                                                                                                                                                                                                                                                                                                                                                                                                                                                                         |
|                                                                                                      | Visual Field Index (VFI)         | Visual field index                                                                                                                                                                                                                                                                                                                                                                                                                                                                                                                          |
|                                                                                                      | PD points                        | Pattern deviation of individual 24-2 test points                                                                                                                                                                                                                                                                                                                                                                                                                                                                                            |
| OCT                                                                                                  | Mean RNFL Thickness              | Mean global retinal nerve fiber layer (RNFL) thickness from optic nerve head (ONH) circle scan. Computed using Spectralis built-in software.                                                                                                                                                                                                                                                                                                                                                                                                |
|                                                                                                      | Sectoral RNFL Thickness          | Mean sectoral RNFL thickness computed from ONH circle scans. Sectors: temporal, temporal-superior, temporal-inferior, nasal, nasal-superior, nasal-inferior                                                                                                                                                                                                                                                                                                                                                                                 |
| Ophthalmic Measurements                                                                              | Spherical Equivalent (SE)        | Spherical equivalent (sphere + ½ cylinder), diopters                                                                                                                                                                                                                                                                                                                                                                                                                                                                                        |
|                                                                                                      | Axial Length (AL)                | Axial length                                                                                                                                                                                                                                                                                                                                                                                                                                                                                                                                |
|                                                                                                      | Central Corneal Thickness (CCT)  | Central corneal thickness, mm                                                                                                                                                                                                                                                                                                                                                                                                                                                                                                               |
|                                                                                                      | Intraocular Pressure (IOP)       | Undilated intraocular pressure, mmHg                                                                                                                                                                                                                                                                                                                                                                                                                                                                                                        |
| Systemic Conditions                                                                                  | -                                | Self-reported presence of systemic conditions including: myocardial infarction, peripheral vascular disease, peptic ulcer disease, HIV, dementia, congestive heart failure, stroke, pulmonary disease, liver disease, diabetes mellitus, renal disease, cancer, metastatic                                                                                                                                                                                                                                                                  |
| Medications                                                                                          | -                                | Self-reported medications based on anatomical-therapeutic-chemical (ATC) drug classifications from the WHO, retrieved via RxNav. Classes include: glaucoma meds, diabetic meds, hypertension meds, anti-inflammatory meds, alpha adrenoreceptor antagonists, glucocorticoids, lipid modifying agents, dermatologicals, opioids, agents for local oral treatment, carbonic anhydrase inhibitors, propionic acid derivatives, beta blockers, other cardiac preparations, prostaglandin analogues, sympathomimetics, insulins, corticosteroids |
| Model Output                                                                                         | -                                | Estimate of probability of surgical intervention. For this analysis, glaucoma surgeries included incisional, laser, or minimally invasive glaucoma surgery (MIGS) procedures.                                                                                                                                                                                                                                                                                                                                                               |
