# Supplementary material for: Proactive Decision Support for Glaucoma Treatment: Predicting Surgical Interventions with Clinically Available Data
Source: MDPI journal article supplement (doi:10.3390/bioengineering11020140), 2024-01-30
Supplement: s1 [file s1]

| <b>Table S2: Performance of all models in predicting surgical interventions at time horizons up to 3 years.</b> |                     |                    |                    |                           |                    |
|-----------------------------------------------------------------------------------------------------------------|---------------------|--------------------|--------------------|---------------------------|--------------------|
| <b>Model Type</b>                                                                                               | <b>Time Horizon</b> | <b>AUC</b>         | <b>Precision</b>   | <b>Sensitivity/Recall</b> | <b>Specificity</b> |
| GBM                                                                                                             | 3 months            | 0.94 (0.91 - 0.97) | 0.79 (0.71 - 0.87) | 0.90 (0.84 - 0.95)        | 0.84 (0.77 - 0.89) |
|                                                                                                                 | 1 year              | 0.95 (0.92 - 0.97) | 0.81 (0.72 - 0.89) | 0.77 (0.68 - 0.85)        | 0.88 (0.83 - 0.94) |
|                                                                                                                 | 2 years             | 0.95 (0.93 - 0.98) | 0.84 (0.76 - 0.91) | 0.87 (0.79 - 0.93)        | 0.90 (0.84 - 0.94) |
|                                                                                                                 | 3 years             | 0.95 (0.93 - 0.98) | 0.93 (0.85 - 0.98) | 0.71 (0.62 - 0.81)        | 0.97 (0.93 - 0.99) |
| Random Forest                                                                                                   | 3 months            | 0.95 (0.92 - 0.97) | 0.84 (0.76 - 0.90) | 0.86 (0.78 - 0.93)        | 0.88 (0.83 - 0.93) |
|                                                                                                                 | 1 year              | 0.93 (0.90 - 0.96) | 0.81 (0.72 - 0.89) | 0.74 (0.65 - 0.83)        | 0.88 (0.83 - 0.93) |
|                                                                                                                 | 2 years             | 0.93 (0.90 - 0.97) | 0.90 (0.82 - 0.96) | 0.77 (0.67 - 0.85)        | 0.94 (0.90 - 0.98) |
|                                                                                                                 | 3 years             | 0.95 (0.93 - 0.98) | 0.93 (0.85 - 0.98) | 0.69 (0.60 - 0.79)        | 0.97 (0.93 - 0.99) |
| Logistic Regression                                                                                             | 3 months            | 0.94 (0.91 - 0.97) | 0.79 (0.71 - 0.87) | 0.89 (0.82 - 0.95)        | 0.84 (0.78 - 0.90) |
|                                                                                                                 | 1 year              | 0.90 (0.87 - 0.94) | 0.77 (0.68 - 0.85) | 0.81 (0.72 - 0.88)        | 0.84 (0.78 - 0.90) |
|                                                                                                                 | 2 years             | 0.86 (0.82 - 0.91) | 0.71 (0.61 - 0.80) | 0.68 (0.58 - 0.77)        | 0.83 (0.76 - 0.89) |
|                                                                                                                 | 3 years             | 0.83 (0.78 - 0.88) | 0.64 (0.53 - 0.73) | 0.68 (0.58 - 0.77)        | 0.77 (0.69 - 0.83) |
| XGBoost                                                                                                         | 3 months            | 0.94 (0.91 - 0.97) | 0.82 (0.73 - 0.89) | 0.80 (0.71 - 0.88)        | 0.88 (0.82 - 0.93) |
|                                                                                                                 | 1 year              | 0.93 (0.90 - 0.96) | 0.82 (0.74 - 0.90) | 0.80 (0.71 - 0.88)        | 0.88 (0.83 - 0.94) |
|                                                                                                                 | 2 years             | 0.96 (0.93 - 0.98) | 0.92 (0.85 - 0.98) | 0.67 (0.56 - 0.76)        | 0.97 (0.93 - 0.99) |
|                                                                                                                 | 3 years             | 0.94 (0.91 - 0.97) | 0.90 (0.82 - 0.96) | 0.78 (0.69 - 0.86)        | 0.94 (0.90 - 0.98) |
| DNN                                                                                                             | 3 months            | 0.90 (0.85 - 0.94) | 0.61 (0.53 - 0.70) | 0.89 (0.82 - 0.95)        | 0.61 (0.52 - 0.69) |
|                                                                                                                 | 1 year              | 0.89 (0.86 - 0.93) | 0.77 (0.67 - 0.86) | 0.74 (0.65 - 0.83)        | 0.86 (0.80 - 0.91) |
|                                                                                                                 | 2 years             | 0.90 (0.87 - 0.94) | 0.81 (0.72 - 0.89) | 0.71 (0.62 - 0.80)        | 0.90 (0.84 - 0.94) |
|                                                                                                                 | 3 years             | 0.90 (0.86 - 0.94) | 0.79 (0.70 - 0.87) | 0.79 (0.70 - 0.87)        | 0.87 (0.81 - 0.92) |

GBM: gradient boosting machine, XGBoost: extreme gradient boosting, DNN: deep neural network
